# Supplementary material for: A role for nitric oxide in the control of breathing in zebrafish (Danio rerio)
Source: Oxford University Press journal article supplement (doi:10.1242/jeb.127795), 2015-01-01
Supplement: jeb127795supp.pdf [file jeb127795supp.pdf]

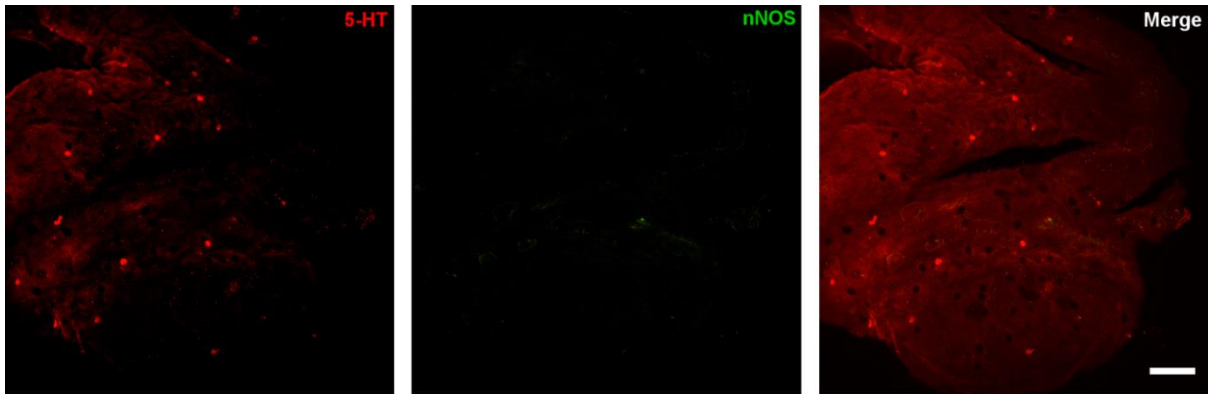

**Figure S1. Immunohistochemical labelling of neuroepithelial cells (NECs) of nNOS knockdown zebrafish larvae (*Danio rerio*) with serotonin (5-HT) and nitric oxide synthase (nNOS).** Double labelling of NECs with serotonin (5-HT) and nNOS shows negligible labelling of NECs with nNOS (green) in knockdown larvae at 4dpf. Scale bar = 50  $\mu$ m.
